# Supplementary material
Source: Springer Nature journal article supplement (https://www.springermedizin.de/resource/supplementary/12935_2009_210_MOESM2_ESM.pdf/9541380)

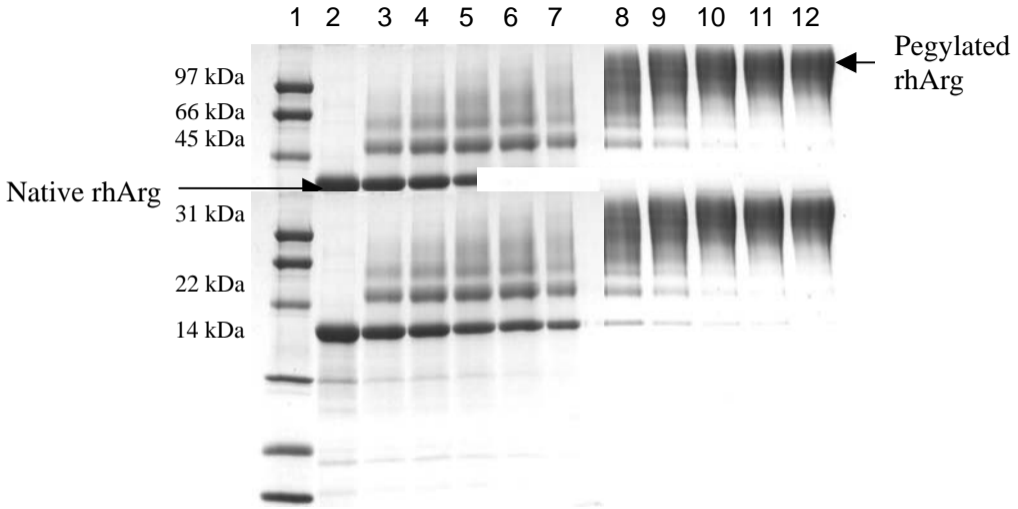

Supplement: MOESM2 [file 9541380]
